# Supplementary material for: Evidence for multiple sex-determining loci in Tasmanian Atlantic salmon (Salmo salar)
Source: PubMed Central journal article supplement — Heredity (Edinb). 2013 Jun 12;113(1):86–92. doi: 10.1038/hdy.2013.55 (PMC4815647; doi:10.1038/hdy.2013.55), 2013-06-12
Supplement: hdy201355x4.pdf [file hdy201355x4.pdf]

Supplementary Table S4. Microsatellite and SNP analysis of SALTAS broodstock families in which the sex-determining gene resides on Ssa06 (AS-4). Markers are arranged in order corresponding to their placement on the female European Atlantic salmon linkage map (See Phillips *et al.* 2009 for nomenclature) www.asabase.org. The seven families originally analyzed are highlighted yellow.

| Marker          | 2009_XX <sup>1</sup>                     |                |                |                |                |                |                |                |                |                |                |                |                |                |                |                | 45             | 44             | 47             | 41             | 42             | 43             | 46          |             |             |             |             |      |   |  |
|-----------------|------------------------------------------|----------------|----------------|----------------|----------------|----------------|----------------|----------------|----------------|----------------|----------------|----------------|----------------|----------------|----------------|----------------|----------------|----------------|----------------|----------------|----------------|----------------|-------------|-------------|-------------|-------------|-------------|------|---|--|
| <b>Ssa02</b>    | 21                                       | 18             | 39             | 40             | 30             | 02             | 15             | 26             | 10             | 24             | 03             | 06             | 36             | 07             | 11             |                |                |                |                |                |                |                |             |             |             |             |             |      |   |  |
| Ssa1077BSFU     |                                          |                | 18/24<br>(1.4) |                |                |                |                | 6/23 (0)       |                |                | 7/14<br>(0)    |                |                |                |                |                |                |                |                |                |                |                |             |             |             |             |             |      |   |  |
| Ssa0055BSFU     | <sup>2</sup> 25/33<br><sup>4</sup> (2.0) | 9/17 (0)       |                | 8/18 (0)       | 13/25 (0)      | 11/18 (0.1)    | 7/16 (0.1)     | 15/22 (0.6)    |                | 6/16 (0)       |                | 11/21 (0)      | 6/16 (0)       | 10/32 (0)      |                |                |                | 11/16 (0.5)    | 12/14 (1.7)    |                |                |                |             |             |             |             |             |      |   |  |
| Ssa0183BSFU     |                                          |                | 17/24<br>(0.9) |                |                | 8/18<br>(0)    |                |                |                |                |                |                |                | 21/32<br>(0.7) | 10/13<br>(0.9) |                | 7/11<br>(0.2)  | 9/11<br>(1.0)  |                |                |                |                |             |             |             |             |             |      |   |  |
| Ssa202DU        |                                          |                |                |                |                |                |                |                |                |                |                |                |                |                | 4/13<br>(0.4)  |                |                |                |                | 5/12<br>(0.1)  | 10/12<br>(1.3) |                |             |             |             |             |             |      |   |  |
| Ssa0233BSFU     |                                          |                |                |                |                |                |                | 7/21 (0)       |                |                |                |                |                |                |                |                |                |                |                |                |                |                |             |             |             |             |             |      |   |  |
| Ssa1265BSFU     |                                          |                |                |                |                |                |                |                |                |                |                |                |                |                |                |                |                |                |                |                |                |                |             |             |             |             |             |      |   |  |
| Ssa0182ECIG     |                                          |                |                |                |                |                |                |                |                |                |                |                |                |                |                |                |                |                |                |                |                |                |             |             |             |             |             |      |   |  |
| <b>Ssa06</b>    |                                          |                |                |                |                |                |                |                |                |                |                |                |                |                |                |                |                |                |                | total          | <b>Ssa06</b>   | LOD            | theta       |             |             |             |             |      |   |  |
| OMM5037         | 31/32<br>(7.7)                           |                |                |                |                |                |                |                |                |                |                |                |                |                |                |                |                | 15/15<br>(4.5) | 10/10<br>(3.0) | 11/11<br>(3.3) | 14/15 (2.9)    | 13/13 (3.9)    | 12/12 (3.6) | 12/12 (3.6) | 118/120     | OMM5037     | 31.7        | 0.02 |   |  |
| Ssa0074ECIG     |                                          |                |                | 25/25<br>(7.5) |                |                |                | 17/21<br>(1.9) |                |                | 14/14<br>(4.2) | 21/21<br>(6.3) | 20/21<br>(4.6) |                |                |                |                |                |                |                |                |                |             |             | 97/102      | Ssa0074ECIG | 22          | 0.05 |   |  |
| Ssa0376BSFU     |                                          |                | 23/25<br>(4.5) | 18/18<br>(5.4) | 25/25<br>(7.5) |                |                | 21/23<br>(4.0) | 20/21<br>(4.6) | 14/16<br>(3.2) | 14/14<br>(4.2) |                |                | 32/32<br>(9.6) | 13/13<br>(3.9) | 15/15<br>(4.5) | 11/11<br>(3.3) | 11/11<br>(3.3) | 15/16<br>(3.2) | 14/14<br>(4.2) | 12/12<br>(3.6) | 13/13<br>(3.9) |             |             | 271/279     | Ssa0376BSFU | 68.2        | 0.03 |   |  |
| Ssa0789BSFU     |                                          | 16/16<br>(2.9) | 23/25<br>(4.5) |                |                |                | 14/16<br>(3.2) |                |                |                |                |                |                |                |                | 14/14<br>(4.2) | 11/11<br>(3.3) | 10/10<br>(3.0) | 14/15<br>(2.9) | 14/14<br>(4.2) | 11/11<br>(3.3) | 13/13<br>(3.9) |             |             | 140/145     | Ssa0789BSFU | 34.2        | 0.03 |   |  |
| Ssa0043BSFU     |                                          |                |                |                |                |                |                |                |                |                |                |                |                |                |                | 11/13<br>(1.5) | 5/5 (1.5)      | 10/10<br>(3.0) | 14/16<br>(3.2) |                | 11/11<br>(3.3) | 13/13<br>(3.9) |             |             | 64/68       | Ssa0043BSFU | 13.9        | 0.06 |   |  |
| Ssa0103aECIG    |                                          |                |                | 19/19<br>(5.4) |                |                |                |                |                |                |                |                |                |                |                |                |                |                |                |                |                |                |             |             |             | 19/19       | E15190_1379 | 5.7  | 0 |  |
| Ssa0142BSFU     |                                          |                |                |                |                |                |                |                |                |                |                |                |                |                |                | 13/13<br>(3.9) | 11/11<br>(3.3) | 11/11<br>(3.3) | 14/15<br>(2.9) | 14/14<br>(4.2) | 12/12<br>(3.6) | 7/7 (2.1)      |             |             | 82/83       | Ssa0142BSFU | 22.6        | 0.01 |   |  |
| Ssa0350BSFU     |                                          |                |                |                |                |                |                |                |                |                |                |                |                |                |                | 4/4 (1.2)      | 11/11<br>(3.3) | 11/11<br>(3.3) | 15/16<br>(3.2) | 14/14<br>(4.2) | 12/12<br>(3.6) | 5/5 (1.5)      | 72/73       |             | Ssa0350BSFU | 19.7        | 0.01        |      |   |  |
| Ssa1299BSFU     |                                          |                |                |                |                | 17/18<br>(3.7) |                | 22/23<br>(5.1) |                |                |                |                |                |                |                |                | 11/11<br>(3.3) | 11/11<br>(3.3) |                |                | 12/12<br>(3.6) | 12/12<br>(3.6) |             |             | 85/87       | Ssa1299BSFU | 22.1        | 0.02 |   |  |
| Ssa0752BSFU     |                                          |                |                |                |                |                |                |                |                |                |                |                |                |                |                | 10/10<br>(3.0) | 10/10<br>(3.0) |                |                |                | 11/11<br>(3.3) | 13/13<br>(3.9) |             |             | 44/44       | Ssa0752BSFU | 12.6        | 0    |   |  |
| <b>Ssa03</b>    |                                          |                |                |                |                |                |                |                |                |                |                |                |                |                |                |                |                |                |                |                |                |                |             |             |             |             |             |      |   |  |
| Ssa0649BSFU     |                                          |                |                |                |                |                |                |                |                |                |                |                |                |                |                |                |                |                |                |                |                |                |             |             |             |             |             |      |   |  |
| Ssa0343BSFU     |                                          |                |                | 6/19<br>(0.6)  |                |                |                |                |                |                |                |                |                |                |                |                |                |                |                |                |                |                |             |             |             |             |             |      |   |  |
| OMM1272         |                                          |                | 11/24<br>(0)   |                |                |                |                |                |                |                |                |                |                |                |                |                |                |                |                |                |                |                |             |             |             |             |             |      |   |  |
| Ssa0017BSFU     |                                          |                |                |                |                |                |                | 8/22<br>(0.3)  |                |                |                | 8/15<br>(0)    |                |                |                |                |                |                |                |                |                |                |             |             |             |             |             |      |   |  |
| ESTNV_29224_109 |                                          |                |                |                |                |                |                |                |                |                |                |                |                |                |                |                |                |                |                |                |                |                |             |             |             |             |             |      |   |  |
| Ssa0368BSFU     | 18/34 (0)                                | 9/17 (0)       |                |                |                |                | 9/16<br>(0.1)  |                |                | 14/17<br>(1.7) |                | 10/21<br>(0)   | 8/21<br>(0.3)  | 17/31<br>(0.1) |                |                |                |                |                |                | 8/14<br>(0.1)  | 9/12<br>(0.7)  |             |             |             |             |             |      |   |  |
| Ssa0818BSFU     |                                          |                |                | 11/25<br>(0.1) | 10/20<br>(0)   |                |                | 6/21<br>(0.9)  |                |                |                |                |                | 7/12<br>(0.1)  |                | 3/10<br>(0.4)  | 4/11<br>(0.2)  | 8/16<br>(0)    |                |                |                |                |             |             |             |             |             |      |   |  |
| Ssa0212BSFU     |                                          |                |                |                |                |                |                |                |                |                |                |                |                |                |                |                |                |                |                |                |                |                |             |             |             |             |             |      |   |  |
| Ssa0516BSFU     |                                          |                |                |                |                |                |                |                |                |                |                |                |                |                |                |                |                |                |                |                |                |                |             |             |             |             |             |      |   |  |
| OMM5019         |                                          |                |                |                |                |                |                |                |                |                |                |                |                |                |                |                |                |                |                |                |                |                |             |             |             |             |             |      |   |  |
| OMM1267         |                                          |                |                |                |                |                |                |                |                |                |                |                |                |                |                |                |                |                |                |                |                |                |             |             |             |             |             |      |   |  |
| SsaD144         |                                          |                |                |                |                |                |                |                |                |                |                |                |                |                |                |                |                |                |                |                |                |                |             |             |             |             |             |      |   |  |
| OMM5037/2       |                                          |                |                |                |                |                |                |                |                |                |                |                |                |                |                |                |                |                |                |                |                |                |             |             |             |             |             |      |   |  |
| Ssa0676BSFU     |                                          |                |                |                |                |                |                |                |                |                |                |                |                |                |                |                |                |                |                |                |                |                |             |             |             |             |             |      |   |  |

<sup>1</sup>Family (2009 year class where family ID's are given as XX, values below). <sup>2</sup>Chromosome number shown in Ssa0X. <sup>3</sup>Number of offspring for which genotype/phenotype agree / number of offspring for which genotype/phenotype disagree. <sup>4</sup>LOD score corresponding to the ratio of correct genotype/phenotype matches:incorrect genotype/phenotype matches in a given family.
