# Supplementary material for: Evidence for multiple sex-determining loci in Tasmanian Atlantic salmon (Salmo salar)
Source: PubMed Central journal article supplement — Heredity (Edinb). 2013 Jun 12;113(1):86–92. doi: 10.1038/hdy.2013.55 (PMC4815647; doi:10.1038/hdy.2013.55), 2013-06-12
Supplement: hdy201355x6.pdf [file hdy201355x6.pdf]

Supplementary Table S6. Microsatellite and SNP analysis of SALTAS broodstock families in which the sex-determining gene housed on Ssa03 (AS-11). Markers are arranged in order corresponding to their placement on the female European Atlantic salmon linkage map. [www.asalbase.org](http://www.asalbase.org)

| Marker                   | 2009_32 <sup>1</sup>                  | 2009_37     | Total | LOD | Theta               |
|--------------------------|---------------------------------------|-------------|-------|-----|---------------------|
| <b>Ssa02<sup>2</sup></b> |                                       |             |       |     |                     |
| Ssa1077BSFU              | 28/35 <sup>3</sup> (2.9) <sup>4</sup> |             |       |     |                     |
| Ssa0055BSFU              |                                       |             |       |     |                     |
| Ssa0183BSFU              |                                       |             |       |     |                     |
| Ssa202DU                 |                                       | 13/17 (1.1) |       |     |                     |
| Ssa0233BSFU              |                                       |             |       |     |                     |
| Ssa1265BSFU              |                                       |             |       |     |                     |
| Ssa0182ECIG              |                                       |             |       |     |                     |
| <b>Ssa06</b>             |                                       |             |       |     |                     |
| OMM5037                  | 16/35 (0)                             |             |       |     |                     |
| Ssa0074ECIG              |                                       | 10/17 (0.1) |       |     |                     |
| Ssa0376BSFU              |                                       |             |       |     |                     |
| Ssa0789BSFU              |                                       |             |       |     |                     |
| Ssa0043BSFU              |                                       |             |       |     |                     |
| Ssa0103aECIG             | 12/35 (0)                             |             |       |     |                     |
| Ssa0142BSFU              |                                       |             |       |     |                     |
| Ssa0350BSFU              |                                       |             |       |     |                     |
| Ssa1299BSFU              |                                       | 8/17 (0)    |       |     |                     |
| Ssa0752BSFU              |                                       |             |       |     |                     |
| <b>Ssa03</b>             |                                       |             |       |     |                     |
| Ssa0649BSFU              | 28/33 (3.8)                           |             | 28/33 | 3.8 | 0.15 Ssa0649BSFU    |
| Ssa0017BSFU              | 30/34 (4.9)                           | 15/16 (3.2) | 45/50 | 8   | 0.1 Ssa0017BSFU     |
| Ssa0368BSFU              | 31/35 (5.1)                           |             | 31/35 | 5.1 | 0.11 Ssa0368BSFU    |
| Ssa0670BSFU              |                                       | 13/17 (1.1) | 13/17 | 1.1 | 0.23 Ssa0670BSFU    |
| OMM1267                  | 24/26 (4.8)                           | 14/15 (2.9) | 38/41 | 7.7 | 0.07 OMM1267        |
| Ssa0516BSFU              | 30/34 (4.9)                           | 15/16 (3.2) | 45/50 | 8   | 0.1 Ssa0516BSFU     |
| OMM5019                  | 29/32 (5.3)                           |             | 29/32 | 5.3 | 0.09 <u>OMM5019</u> |
| SsaD144                  | 30/34 (4.9)                           |             |       |     |                     |

<sup>1</sup>Family (2009 year class where family ID's are given as

XX, values below). <sup>2</sup>Chromosome number shown in

Ssa0X. <sup>3</sup>(Number of offspring for which genotype and phenotype agree) / (number of offspring for which

genotype and phenotype disagree). <sup>4</sup>LOD score

corresponding to the ratio of correct genotype and phenotype matches:incorrect genotype and phenotype
